# Supplementary material for: Supported and inserted monomeric niobium oxide species on/in silica: a molecular picture
Source: Royal Society of Chemistry journal article supplement (doi:10.1039/c5cp03450g), 2015-01-01
Supplement: c5cp03450g1.pdf [file c5cp03450g1.pdf]

# Supported and Inserted Monomeric Niobium Oxide Species on/in Silica: A Molecular Picture

Diana C. Tranca<sup>1</sup>, Anna Wojtaszek-Gurdak<sup>2</sup>, Maria Ziolk<sup>2</sup>, Frederik Tielens<sup>3,\*</sup>

<sup>1</sup> Technische Universität Hamburg, Harburg, Chemische Reaktionstechnik, Eißendorfer Straße  
38 21073 Hamburg, Germany

<sup>2</sup> A. Mickiewicz University, Faculty of Chemistry Grunwaldzka 6, Poznan, Poland

<sup>3</sup> Sorbonne Universités, UPMC Univ Paris 06, UMR 7574, Laboratoire Chimie de la Matière  
Condensée, Collège de France, 11 place Marcelin Berthelot, 75231 Paris Cedex 05, France

**\*Corresponding authors:**

F. Tielens, e-mail : [frederik.tielens@upmc.fr](mailto:frederik.tielens@upmc.fr), tel.: + 33 1 44276004, fax: + 33 1 44276033

## Supplementary Material

**Table S1.** Calculated frequencies for selected models (A, B, C, D, and E) with one Nb per unit cell grafted on the silica surface model. (Values in  $\text{cm}^{-1}$ )

| Model | Frequency   | Vibrational Mode                |
|-------|-------------|---------------------------------|
| A-V   | 3784        | NbO-H stretching                |
|       | 1009 – 1000 | Nb=O                            |
|       | 936 – 843   | Nb–O–Si stretching              |
|       | 723         | NbO–H stretching (O stretching) |
|       | 614 – 609   | Nb–O–Si stretching              |
| B-G   | 3347        | NbO-H stretching (H bonded)     |
|       | 1015 – 969  | Nb=O                            |
|       | 912         | Nb–O–Si stretching              |
|       | 861 – 726   | NbO-H bending                   |
|       | 711         | NbO-H stretching (O stretching) |
| C     | 3784 – 3770 | NbO-H stretching (H bonded)     |
|       | 1016 – 918  | Nb–O–Si stretching              |
|       | 870         | Nb–O–Si stretching              |
|       | 722         | NbO-H bending                   |
|       | 664 – 659   | NbO-H stretching (O stretching) |
|       | 642         | NbO-H stretching (O stretching) |
| D     | 1019        | Nb–O–Si stretching              |
|       | 964         | Nb=O                            |
|       | 895 – 841   | Nb–O–Si stretching              |
|       | 637 – 616   | Nb–O–Si stretching              |
| E     | 3770        | NbO-H stretching (H bonded)     |
|       | 1036 – 1018 | Nb–O–Si stretching              |
|       | 922         | Nb–O–Si stretching              |

|                          |           |                    |
|--------------------------|-----------|--------------------|
|                          | 882 – 857 | Nb–O–Si stretching |
|                          | 674       | NbO-H bending      |
|                          | 630 – 607 | NbO-H stretching   |
|                          | 602       | NbO-H stretching   |
| SiO <sub>2</sub> surface | 3851      | SiO-H stretching   |

**Table S2.** Calculated frequencies for selected double unit cell surface models with two Nb species. (Values in cm<sup>-1</sup>)

| Model       | Frequency   | Vibration Mode                                                            |
|-------------|-------------|---------------------------------------------------------------------------|
| Structure-1 | 3770        | NbO-H stretching (NbO <sub>5</sub> )                                      |
|             | 1066        | Nb–O–Si stretching (NbO <sub>6</sub> ) ; Nb=O                             |
|             | 986         | Nb–O–Si stretching (NbO <sub>6</sub> )                                    |
|             | 983         | Nb–O–Si stretching (NbO <sub>5</sub> ) ; Nb=O                             |
|             | 970         | Si–O–Si stretching (NbO <sub>6</sub> )                                    |
|             | 937 – 918   | Nb–O–Si stretching (NbO <sub>6</sub> )                                    |
|             | 905         | Nb=O (NbO <sub>5</sub> )                                                  |
|             | 905         | Nb=O (NbO <sub>6</sub> )                                                  |
|             | 879         | Nb–O–Si stretching (NbO <sub>5</sub> )                                    |
|             | 757         | Si–O–Si stretching (NbO <sub>5</sub> )                                    |
|             | 693         | NbO-H stretching (O stretching) (NbO <sub>5</sub> )                       |
|             | 690         | NbO-H stretching (O stretching) (NbO <sub>5</sub> ); Nb-O-Si (Si bending) |
|             | 674 – 602   | Nb-O-Si bending (Si bending) (NbO <sub>5</sub> , NbO <sub>6</sub> )       |
|             | 597         | Nb–O–Si stretching (NbO <sub>6</sub> )                                    |
|             | 593         | NbO-H (H bending; O stretching) (NbO <sub>5</sub> )                       |
|             | 578 – 542   | Nb–O–Si stretching (NbO <sub>5</sub> )                                    |
|             | 562 – 557   | Nb–O–Si stretching (NbO <sub>6</sub> )                                    |
| Structure-2 | 3269        | NbO-H stretching (NbO <sub>4</sub> )                                      |
|             | 1071 – 1055 | Nb–O–Si stretching (NbO <sub>6</sub> )                                    |

|             |             |                                                     |
|-------------|-------------|-----------------------------------------------------|
|             | 1027 – 974  | Nb–O–Si stretching (NbO <sub>6</sub> )              |
|             | 947 – 941   | Nb–O–Si stretching (NbO <sub>6</sub> )              |
|             | 933 – 915   | Nb–O–Si stretching (NbO <sub>6</sub> )              |
|             | 918 – 906   | Nb–O–Si stretching (NbO <sub>4</sub> )              |
|             | 901 – 648   | Nb–O–Si stretching (NbO <sub>6</sub> )              |
|             | 890         | Nb=O                                                |
|             | 835 – 780   | Nb–O–Si stretching (NbO <sub>4</sub> )              |
|             | 808         | NbO-H bending (NbO <sub>4</sub> )                   |
|             | 674         | NbO-H (O stretching; H bending) (NbO <sub>4</sub> ) |
|             | 671         | NbO-H bending (NbO <sub>4</sub> )                   |
| Structure-3 | 3769        | NbO-H stretching (NbO <sub>4</sub> )                |
|             | 3650        | NbO-H stretching (NbO <sub>4</sub> )                |
|             | 1068 – 1047 | Nb–O–Si stretching (NbO <sub>6</sub> )              |
|             | 1033 – 992  | Nb–O–Si stretching (NbO <sub>6</sub> )              |
|             | 958 – 934   | Nb–O–Si stretching (NbO <sub>6</sub> )              |
|             | 937 – 850   | Nb–O–Si stretching (NbO <sub>4</sub> )              |
|             | 902         | Nb=O                                                |
|             | 900         | Nb=O; Nb–O–Si stretching (NbO <sub>6</sub> )        |
|             | 671         | NbO-H stretching (O stretching) (NbO <sub>4</sub> ) |
|             | 661         | NbO-H (O stretching; H bending) (NbO <sub>4</sub> ) |
|             | 657         | Nb–O–Si stretching (NbO <sub>6</sub> )              |
|             | 601         | NbO-H (O stretching) (NbO <sub>4</sub> )            |
| Structure-4 | 2263        | NbO-H stretching (NbO <sub>4</sub> )                |
|             | 1107        | NbO-H bending (NbO <sub>4</sub> )                   |
|             | 1066 – 1035 | Nb–O–Si stretching (NbO <sub>6</sub> )              |
|             | 989 – 957   | Nb–O–Si stretching (NbO <sub>6</sub> )              |
|             | 951         | NbO-H bending (NbO <sub>4</sub> )                   |
|             | 936 – 910   | Nb–O–Si stretching (NbO <sub>6</sub> )              |
|             | 925         | Nb–O–Si stretching (NbO <sub>4</sub> )              |
|             | 895         | Nb=O                                                |

|             |                                 |                                                                           |
|-------------|---------------------------------|---------------------------------------------------------------------------|
|             | 893 - 878                       | Nb–O–Si stretching (NbO <sub>6</sub> )                                    |
|             | 849 – 846                       | Nb–O–Si stretching (NbO <sub>4</sub> )                                    |
|             | 745                             | NbO-H (O stretching) (NbO <sub>4</sub> )                                  |
|             | 652                             | Nb–O–Si stretching (NbO <sub>6</sub> )                                    |
|             | 618                             | Nb–O–Si bending (NbO <sub>6</sub> )                                       |
|             | 615                             | Nb–O–Si stretching (NbO <sub>4</sub> )                                    |
| Structure-5 | 3708 – 3332                     | NbO-H stretching (H bonded) (NbO <sub>4</sub> )                           |
|             | 1077 – 1030                     | Nb–O–Si stretching (NbO <sub>6</sub> )                                    |
|             | 998 – 975; 958 – 948; 941 – 926 | Nb–O–Si stretching (NbO <sub>6</sub> , NbO <sub>4</sub> )                 |
|             | 919                             | Nb–O–Si stretching (NbO <sub>6</sub> )                                    |
|             | 909                             | NbO-H bending (NbO <sub>4</sub> )                                         |
|             | 906 – 874                       | NbO-H bending (NbO <sub>4</sub> ); Nb–O–Si stretching (NbO <sub>6</sub> ) |
|             | 832                             | Nb–O–Si stretching (NbO <sub>4</sub> )                                    |
|             | 825                             | Nb=O                                                                      |
|             | 753 – 684                       | NbO-H stretching (O stretching) (NbO <sub>4</sub> )                       |
|             | 679                             | NbO-H bending (NbO <sub>4</sub> )                                         |
| Structure-6 | 3747 – 2523                     | NbO-H stretching (NbO <sub>4</sub> )                                      |
|             | 1070 – 1039                     | Nb–O–Si stretching (NbO <sub>6</sub> )                                    |
|             | 1019                            | NbO-H bending (NbO <sub>4</sub> )                                         |
|             | 988 – 972                       | Nb–O–Si stretching (NbO <sub>6</sub> )                                    |
|             | 950                             | NbO-H bending (NbO <sub>4</sub> )                                         |
|             | 949                             | NbO-H bending (NbO <sub>4</sub> ); Nb–O–Si stretching (NbO <sub>6</sub> ) |
|             |                                 | Nb–O–Si stretching (NbO <sub>6</sub> )                                    |
|             | 944 – 940                       | Nb–O–Si stretching (NbO <sub>6</sub> )                                    |
|             | 913 – 901                       | Nb–O–Si stretching (NbO <sub>4</sub> )                                    |
|             | 903 – 836                       | Nb=O                                                                      |
|             | 893                             | NbO-H stretching (O stretching) (NbO <sub>4</sub> )                       |
|             | 770 – 738                       | Nb–O–Si stretching (NbO <sub>6</sub> )                                    |

|             |                                                                                                                                                               |                                                                                                                                                                                                                                                                                                                                                                                                                                                                                                                                                                                                                                                                                                                                                           |
|-------------|---------------------------------------------------------------------------------------------------------------------------------------------------------------|-----------------------------------------------------------------------------------------------------------------------------------------------------------------------------------------------------------------------------------------------------------------------------------------------------------------------------------------------------------------------------------------------------------------------------------------------------------------------------------------------------------------------------------------------------------------------------------------------------------------------------------------------------------------------------------------------------------------------------------------------------------|
|             | 650<br>613                                                                                                                                                    | Nb–O–Si stretching (NbO <sub>4</sub> )                                                                                                                                                                                                                                                                                                                                                                                                                                                                                                                                                                                                                                                                                                                    |
| Structure-7 | 1067 – 1061<br>1043<br>1010<br>988 – 972<br>971 – 930<br>929<br>920<br>910 – 904<br>888 – 873<br>852<br>830<br>647                                            | Nb–O–Si stretching (NbO <sub>6</sub> )<br>Nb–O–Si stretching (NbO <sub>6</sub> )<br>Nb–O–Si stretching (NbO <sub>6</sub> ; NbO <sub>4</sub> )<br>Nb–O–Si stretching (NbO <sub>6</sub> )<br>Nb–O–Si stretching (NbO <sub>6</sub> )<br>Nb–O–Si stretching (NbO <sub>6</sub> )<br>Nb–O–Si stretching (NbO <sub>4</sub> )<br>Nb=O (Nb O <sub>6</sub> )<br>Nb–O–Si stretching (NbO <sub>6</sub> )<br>Nb–O–Si stretching (NbO <sub>6</sub> )<br>Nb–O–Si stretching (NbO <sub>4</sub> )<br>Nb–O–Si stretching (NbO <sub>6</sub> )                                                                                                                                                                                                                                |
| Structure 8 | 3724<br>3648<br>1064 – 1040<br>1038<br>1021<br>1003<br>988 – 984<br>968 – 943<br>941 – 920<br>900<br>892<br>885 – 881<br>874<br>815 – 774<br>695<br>666 – 594 | NbO-H stretching (NbO <sub>4</sub> )<br>NbO-H stretching (NbO <sub>4</sub> )<br>Nb–O–Si stretching (NbO <sub>6</sub> )<br>Nb–O–Si stretching (NbO <sub>6</sub> )<br>Nb–O–Si bending (NbO <sub>4</sub> )<br>Nb–O–Si stretching (NbO <sub>4</sub> )<br>Nb–O–Si stretching (NbO <sub>6</sub> )<br>Nb–O–Si stretching (NbO <sub>6</sub> )<br>Nb–O–Si stretching (NbO <sub>6</sub> )<br>Nb–O– Si stretching (NbO <sub>6</sub> )<br>Nb=O (NbO <sub>6</sub> ); Nb–O–Si stretching (NbO <sub>4</sub> )<br>Nb–O–Si stretching (NbO <sub>4</sub> )<br>Nb=O (NbO <sub>6</sub> ); Nb–O–Si stretching (NbO <sub>4</sub> )<br>Nb–O–Si stretching (NbO <sub>4</sub> )<br>NbO-H (O stretching) (NbO <sub>4</sub> )<br>NbO-H (O stretching; H bending) (NbO <sub>4</sub> ) |

|     |                                       |
|-----|---------------------------------------|
| 648 | Nb–O–Si stretching ( $\text{NbO}_6$ ) |
| 619 | Nb–O–Si stretching ( $\text{NbO}_4$ ) |

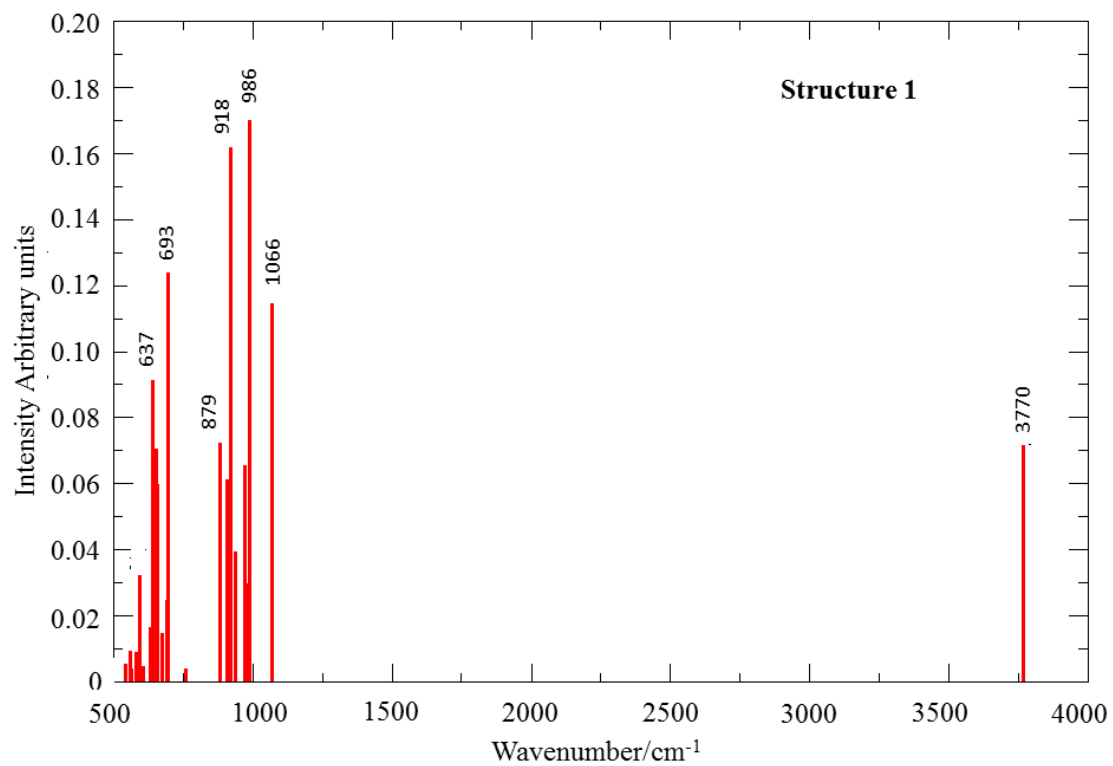

**Figure S1.** Calculated Infrared spectrum for Structure 1.
